# Supplementary material for: Further elaboration of the stereodivergent approach to chaetominine-type alkaloids: synthesis of the reported structures of aspera chaetominines A and B and revised structure of aspera chaetominine B
Source: publisher site journal article supplement (doi:10.3762/bjoc.21.162), 2025-10-13

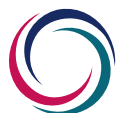

## Supporting Information

for

### **Further elaboration of the stereodivergent approach to chaetominine-type alkaloids: synthesis of the reported structures of aspera chaetominines A and B and revised structure of aspera chaetominine B**

Jin-Fang Lü, Jiang-Feng Wu, Jian-Liang Ye and Pei-Qiang Huang

*Beilstein J. Org. Chem.* **2025**, 21, 2072–2081. doi:10.3762/bjoc.21.162

**General methods and materials, experimental procedures, characterization data, and copies of  $^1\text{H}$  and  $^{13}\text{C}$  NMR spectra of compounds 19/20, 25, 26, 12, 13, and 6**

## Table of contents

|                                                                                                                                                       |     |
|-------------------------------------------------------------------------------------------------------------------------------------------------------|-----|
| 1. Experimental section                                                                                                                               | S1  |
| 2. X-Ray structure of compound <b>19/20</b>                                                                                                           | S10 |
| 3. Chiral HPLC diagrams of compounds ( $\pm$ )- <b>7</b> and (+)- <b>7</b>                                                                            | S14 |
| 4. The comparison of $^1\text{H}$ NMR and $^{13}\text{C}$ NMR data of our synthetic (–)-<br>isochaetominine C ( <b>6</b> ) with aspera chaetominine B | S16 |
| 5. References                                                                                                                                         | S18 |
| 6. Copies of NMR spectra of <b>19/20, 25, 26, 12, 13, 6</b>                                                                                           | S19 |

## EXPERIMENTAL SECTION

### General

Melting points were determined by a Switzerland Büchi M-560 automatic melting point apparatus. Infrared spectra were measured with a Nicolet Avatar 330 FT-IR spectrometer using film KBr pellet techniques.  $^1\text{H}$  NMR and  $^{13}\text{C}$  NMR spectra were recorded on 500 MHz spectrometer with  $\text{CDCl}_3$  or  $\text{CD}_3\text{OD}$  as solvent. Chemical shifts ( $\delta$ ) are reported in ppm and respectively referenced to either the internal standard  $\text{Me}_4\text{Si}$  (TMS) or solvent signals ( $\text{Me}_4\text{Si}$  at 0 ppm for  $^1\text{H}$  NMR, and  $\text{CDCl}_3$  at 77.0 ppm,  $\text{DMSO}-d_6$  at 40.0 ppm or  $\text{CD}_3\text{OD}$  at 49.0 ppm for  $^{13}\text{C}$  NMR). HRMS spectra were recorded on a Bruker Dalton Esquire 3000 plus mass spectrometer by the ESI method. Chiral HPLC analysis was performed on an Agilent LC1260 instrument. Unless otherwise stated, reactions were performed in oven-dried glassware under a nitrogen atmosphere using standard Schlenk techniques. Flash column chromatography was performed with silica gel (300–400 mesh), eluting with EtOAc/petroleum ether. THF used in the reactions was dried by distillation over metallic sodium and benzophenone; dichloromethane was distilled from calcium hydride; anhydrous acetone employed was dried using 4 Å molecular sieves. All other commercially available compounds were used as received.

### General procedure for step 1

The procedures for the preparation of (2-nitrobenzoyl)-D-tryptophan from D-tryptophan by *N*-aroylation with **23** have been described in our previous reports [1,2].

### General procedure for step 2 (general procedure 2)

To a solution of (2-nitrobenzoyl)-D-tryptophan (1.02 mmol) in THF (4 mL) at  $-30\text{ }^\circ\text{C}$  NMM (0.17 mL, 1.53 mmol) and  $i\text{BuOCOC1}$  (0.15 mL, 1.12 mmol) were added successively. After being stirred at  $-30\text{ }^\circ\text{C}$  under Ar atmosphere for 1 h, a solution of an amino acid methyl ester hydrochloride acid salt (2.04 mmol) and NMM (0.34 mL, 3.06 mmol) in THF (7 mL) was added slowly to the resulting suspension. The mixture was stirred for 8 h, then quenching with a saturated aqueous solution of  $\text{NH}_4\text{Cl}$  (5 mL).

The resulting mixture was diluted with water (20 mL) and the phases separated. The aqueous phase was extracted with EtOAc (10 mL  $\times$  3). The combined organic phases were dried over anhydrous Na<sub>2</sub>SO<sub>4</sub>, filtered and concentrated under reduced pressure. The residue was purified by flash chromatography on silica gel to give the dipeptide derivative.

**Benzyl (S)-2-((R)-3-(1H-indol-3-yl)-2-(2-nitrobenzamido)propanamido)-3-methylbutanoate (27).**

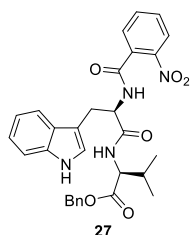

Following the general procedure 2, the reaction of compound (2-nitrobenzoyl)-D-tryptophan (99 mg, 0.28 mmol) gave, after flash chromatography on silica gel (eluent: EtOAc: PE = 1:1), compound **27** (135 mg, yield: 89%) as white solid. The <sup>1</sup>H NMR, <sup>13</sup>C NMR data are consistent with those reported in the literature [1].

**General procedure for step 3 (general procedure 3)**

To a mixture of zinc powder (517 mg, 7.96 mmol) and THF (33 mL), TiCl<sub>4</sub> (0.44 mL, 3.99 mmol) was added at 0 °C. The resulting mixture was heated to 50 °C and stirred for 1 h. After cooling to 0 °C, a solution of the tryptophan-derived dipeptide (1.00 mmol) in THF (6.7 mL) and trimethylorthoformate (0.44 mL, 3.99 mmol) were added successively. The mixture was stirred at 0 °C for 24 h. Brine (6 mL) was then added to the reaction mixture, and the resulting suspension was stirred for 2 h. Following phase separation, the aqueous phase was extracted with EtOAc (20 mL  $\times$  3). The combined organic phases were dried over anhydrous Na<sub>2</sub>SO<sub>4</sub>, filtered, and concentrated under reduced pressure. The residue was purified by flash chromatography on silica gel to give the corresponding quinazolino-dipeptide derivative.

**Methyl ((R)-3-(1H-indol-3-yl)-2-(4-oxoquinazolin-3(4H)-yl)propanoyl)-L-  
isoleucinate (25)**

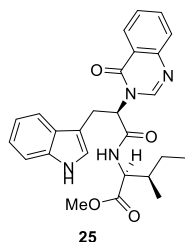

Following the general procedure 1-3, the reaction of compound D-Trp (61 mg, 0.3 mmol), **23** and **24** gave, after flash chromatography on silica gel (eluent: EtOAc:PE = 1:1), compound **25** (110 mg, yield: 80%) as white solid.

**25:** Mp 84-86 °C (eluent : EtOAc, hexane);  $[\alpha]_D^{20}$  52.38 (*c* 1.0, CHCl<sub>3</sub>); <sup>1</sup>H NMR (500 MHz, CDCl<sub>3</sub>)  $\delta$  8.44 (s, 1H), 8.30 (s, 1H), 8.24 (d, *J* = 8.1 Hz, 1H), 7.74 – 7.64 (m, 3H), 7.43 (ddd, *J* = 8.2, 6.8, 1.6 Hz, 1H), 7.30 (d, *J* = 8.1 Hz, 1H), 7.16 (ddd, *J* = 8.1, 7.0, 1.2 Hz, 1H), 7.09 (ddd, *J* = 8.0, 7.1, 1.0 Hz, 1H), 7.03 (d, *J* = 2.4 Hz, 1H), 6.89 (d, *J* = 8.5 Hz, 1H), 5.94 (dd, *J* = 8.9, 7.0 Hz, 1H), 4.45 (dd, *J* = 8.4, 5.0 Hz, 1H), 3.74 (dd, *J* = 14.5, 9.0 Hz, 1H), 3.55 (s, 3H), 3.44 (dd, *J* = 14.5, 7.0 Hz, 1H), 1.72 – 1.63 (m, 1H), 1.27 – 1.14 (m, 1H), 0.99 – 0.86 (m, 1H), 0.78 (t, *J* = 7.3 Hz, 3H), 0.66 (d, *J* = 6.9 Hz, 3H). <sup>13</sup>C NMR (125 MHz, CDCl<sub>3</sub>)  $\delta$  171.5, 168.7, 161.3, 147.5, 144.3, 136.3, 134.5, 127.5, 127.2, 126.9, 126.9, 123.3, 122.4, 121.5, 119.9, 118.5, 111.3, 109.5, 57.0, 56.4, 52.1, 37.5, 27.5, 25.0, 15.1, 11.5. IR (neat, cm<sup>-1</sup>): 3318, 2924, 1742, 1658, 1260; HRMS (ESI, *m/z*) calcd for C<sub>26</sub>H<sub>28</sub>N<sub>4</sub>O<sub>4</sub>Na (M+Na<sup>+</sup>): 483.2003, found: 483.2015.

**Benzyl ((R)-3-(1H-indol-3-yl)-2-(4-oxoquinazolin-3(4H)-yl)propanoyl)-L-valinate  
(28)**

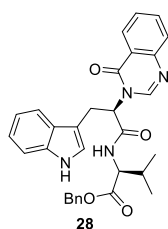

Following the general procedure 3, the reaction of compound **27** (163 mg, 0.3 mmol) gave, after flash chromatography on silica gel (eluent: EtOAc: PE = 1:1), compound **28**

(152 mg, yield: 97%) as white solid. The  $^1\text{H}$  NMR,  $^{13}\text{C}$  NMR data are consistent with those reported in the literature [1].

#### General procedure for step 4 (general procedure 4-A)

In a manner similar to our previous work [1], to a solution of the quinazolinonyl dipeptide derivative (0.28 mmol) in anhydrous acetone (2 mL), DMDO (0.04 M in acetone, 14 mL, 0.56 mmol) was added at  $-78\text{ }^\circ\text{C}$ . After being stirred for 1 h, saturated aqueous solution of  $\text{Na}_2\text{SO}_3$  (10 mL) was added and the resulting mixture was stirred at  $0\text{ }^\circ\text{C}$  for 10 min, then warmed to  $45\text{ }^\circ\text{C}$  and stirred for 2 h. The reaction was quenched with a saturated aqueous solution of  $\text{NH}_4\text{Cl}$  (10 mL) and concentrated under reduced pressure. To the resulting residue was added  $\text{H}_2\text{O}$  (50 mL), and the mixture was extracted with EtOAc ( $30\text{ mL} \times 3$ ). The combined organic layers were washed with brine (2 mL), dried over anhydrous  $\text{Na}_2\text{SO}_4$ , filtered, and concentrated under reduced pressure. The residue was purified by flash chromatography on silica gel to give an isochaetominine-type compound, or versiquinazoline H-type compound and a monocyclization product.

#### Aspera chaetominine A (proposed structure, **12**) and **26**

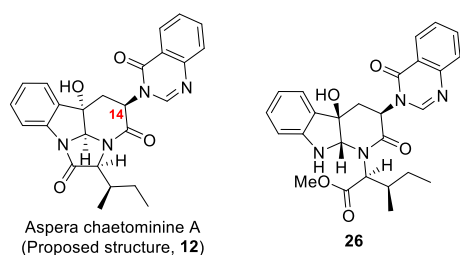

Following general procedure 4-A, the reaction of compound **25** (129 mg, 0.28 mmol) gave, after flash chromatography on silica gel (eluent: EtOAc:PE = 1:1 to 2:1), compound **12** (38 mg, yield: 31%) as white crystal and **26** (60 mg, yield: 45%) as white solid. The  $^1\text{H}$  NMR,  $^{13}\text{C}$  NMR data used  $\text{DMSO}-d_6$  are consistent with those reported in the literature [2].

**12:**  $^1\text{H}$  NMR (500 MHz, Methanol- $d_4$ )  $\delta$  8.21 (*app.* d,  $J = 6.4\text{ Hz}$ , 2H), 7.82 (ddt,  $J = 8.5, 4.7, 1.5\text{ Hz}$ , 1H), 7.68 (dd,  $J = 8.2, 2.4\text{ Hz}$ , 1H), 7.55 (d,  $J = 8.1\text{ Hz}$ , 2H), 7.46 (d,

$J = 7.6$  Hz, 1H), 7.40 (t,  $J = 7.8$  Hz, 1H), 7.22 (t,  $J = 7.6$  Hz, 1H), 5.49 (s, 1H), 4.58 (d,  $J = 3.0$  Hz, 1H), 3.10 – 2.85 (m + br s, 2H), 2.66 (d,  $J = 12.7$  Hz, 1H), 1.69 (*app.* quintet,  $J = 7.5$  Hz, 2H), 0.94 (td,  $J = 7.5, 1.7$  Hz, 3H), 0.83 (d,  $J = 6.8$  Hz, 3H) (resonance of H14 was not observed due to slow hindered rotation of C14-N bond) [2];  $^{13}\text{C}$  NMR (125 MHz, Methanol- $d_4$ )  $\delta$  172.8, 167.6, 162.4, 148.7, 148.3, 140.8, 136.8, 136.0, 131.4, 128.7, 128.0, 127.7, 126.8, 125.8, 123.1, 115.9, 84.3, 78.2, 68.4, 61.1 (broad weak resonance of C14 due to slow hindered rotation of C14-N bond) [2], 39.5, 34.0, 26.3, 14.2, 12.9.

**26:** Mp 125-127 °C (EtOAc, hexane);  $[\alpha]_D^{20}$  194.3 ( $c$  1.0,  $\text{CHCl}_3$ );  $^1\text{H}$  NMR (500 MHz,  $\text{CDCl}_3$ )  $\delta$  8.19 (dd,  $J = 8.0, 1.5$  Hz, 1H), 7.71 (ddd,  $J = 8.5, 7.0, 1.6$  Hz, 1H), 7.63 (d,  $J = 7.7$  Hz, 1H), 7.50 (br s, 1H), 7.44 (t,  $J = 7.6$  Hz, 1H), 7.29 (dd,  $J = 7.5$  Hz, 1H), 7.16 (t,  $J = 7.5$  Hz, 1H), 6.79 (t,  $J = 7.5$  Hz, 1H), 6.67 (d,  $J = 7.9$  Hz, 1H), 5.49 (d,  $J = 4.5$  Hz, 1H), 5.17 (d,  $J = 4.5$  Hz, 1H), 5.03 (d,  $J = 10.6$  Hz, 1H), 3.88 (br s, 1H), 3.76 (s, 3H), 2.89 (br s, 1H), 2.47 (dd,  $J = 12.1, 3.9$  Hz, 1H), 2.10 – 1.98 (m, 1H), 1.82 (s, 1H), 1.77 – 1.67 (m, 1H), 1.45 – 1.32 (m, 1H), 1.03 – 0.90 (m, 6H).  $^{13}\text{C}$  NMR (125 MHz,  $\text{CDCl}_3$ )  $\delta$  173.8, 170.5, 160.5, 148.4, 147.2, 145.2, 134.4, 130.9, 129.2, 127.3, 127.1, 127.0, 123.8, 121.8, 120.3, 110.3, 80.1, 79.8, 59.0, 52.2, 41.1, 34.6, 24.6, 15.4, 10.3 (resonance of C14 was not observed due to slow hindered rotation of C14-N bond) [2]. IR (neat,  $\text{cm}^{-1}$ ): 3389, 2924, 1683, 1612, 1471, 1228, 1174; HRMS (ESI,  $m/z$ ) calcd for  $\text{C}_{26}\text{H}_{28}\text{N}_4\text{O}_5\text{Na}$  ( $\text{M}+\text{Na}^+$ ): 499.1952, found: 499.1945.

### Aspera chaetominine B (Proposed structure, 13) and 29

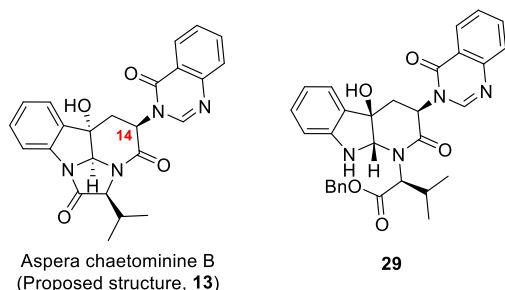

Following general procedure 4-A, the reaction of compound **28** (146 mg, 0.28 mmol) gave, after flash chromatography on silica gel (eluent: EtOAc:PE = 1:1 to 2:1),

compound **13** (26 mg, yield: 22%) as white solid and **29** (45 mg, yield: 30%) as white solid. The  $^1\text{H}$  NMR,  $^{13}\text{C}$  NMR data used  $\text{DMSO}-d_6$  are consistent with those reported in the literature [1].

**13**:  $^1\text{H}$  NMR (500 MHz, Methanol- $d_4$ )  $\delta$  8.27 – 8.15 (m, 2H), 7.87 – 7.78 (m, 1H), 7.69 (dd,  $J = 7.9, 4.8$  Hz, 1H), 7.56 (t,  $J = 7.7$  Hz, 2H), 7.46 (d,  $J = 7.6$  Hz, 1H), 7.41 (tdd,  $J = 7.8, 3.1, 1.5$  Hz, 1H), 7.26 – 7.17 (m, 1H), 5.49 (s, 1H), 4.49 (s, 1H), 3.31 (m, 1H), 2.80 – 3.20 (*br. s*, 1H), 2.65 (d,  $J = 12.7$  Hz, 1H), 1.21 (d,  $J = 7.2$  Hz, 1H), 0.87 (d,  $J = 6.8$  Hz, 1H), (resonance of H14 was not observed due to slow hindered rotation of C14-N bond) [2];  $^{13}\text{C}$  NMR (125 MHz, Methanol- $d_4$ )  $\delta$  172.9, 167.7, 162.4, 148.7, 148.6, 140.9, 136.9, 136.0, 131.4, 128.8, 128.0, 127.7, 126.8, 125.8, 123.4, 115.9, 84.3, 78.3, 69.4, 60.2 (broad weak resonance of C14 due to slow hindered rotation of C14-N bond) [2], 39.5, 27.2, 18.4, 16.5.

#### General procedure for step 4 (general procedure 4-B)

To a solution of a quinazolinonyl dipeptide derivative (0.28 mmol) in anhydrous acetone (2 mL), DMDO (0.04 M in acetone, 14 mL, 0.56 mmol) was added at  $-78\text{ }^\circ\text{C}$ . After being stirred for 1 h,  $\text{K}_2\text{CO}_3/\text{MeOH}$  (94 mg/10 mL, stood at rt overnight, pH = 11) was added to the mixture, which was subsequently warmed to  $35\text{ }^\circ\text{C}$  over a period of 30 min. The reaction was quenched with a saturated aqueous solution of  $\text{NH}_4\text{Cl}$  (10 mL) and concentrated under reduced pressure. Water (50 mL) was added to the resulting residue, and the mixture was extracted with EtOAc (30 mL  $\times$  3). The combined organic layers were washed with brine (2 mL), dried over anhydrous  $\text{Na}_2\text{SO}_4$ , filtered, and concentrated under reduced pressure. The residue was purified by flash chromatography on silica gel to give two kinds of versiquinazoline H-type compounds.

**(2*S*,3*S*,11*R*,14*R*,28*S*)-2,3,11-tris-*epi*-versiquinazoline H (19) and  
(2*R*,3*R*,11*S*,14*S*,28*S*)-14-*epi*-versiquinazoline H (20)**



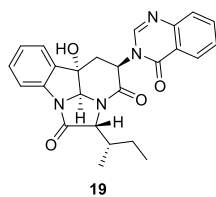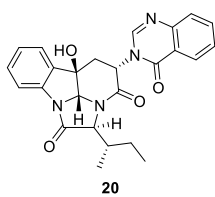

Following general procedure 4-B, the reaction of compound **17** (150 mg, 0.28 mmol) gave, after flash chromatography on silica gel (eluent: EtOAc:PE = 1:2 to 1:1), **19** and **20** (white crystals, 93 mg, yield: 75%) as inseparable compounds. The reaction of compound **18** (150 mg, 0.28 mmol) also yielded **19** and **20** (90 mg, yield: 73%).

**19** and **20**: Mp 270-272 °C (EtOAc, hexane);  $[\alpha]_D^{20} -7.8$  ( $c$  0.1, CH<sub>3</sub>OH); <sup>1</sup>H NMR (500 MHz, DMSO-*d*<sub>6</sub>)  $\delta$  8.24 (d,  $J$  = 5.4 Hz, 1H), 8.21 (d,  $J$  = 8.0 Hz, 1H), 7.87 (ddd,  $J$  = 8.4, 7.2, 1.6 Hz, 1H), 7.71 (d,  $J$  = 8.1 Hz, 1H), 7.59 (t,  $J$  = 7.6 Hz, 1H), 7.50 (dd,  $J$  = 7.7, 3.8 Hz, 1H), 7.48 (d,  $J$  = 7.7 Hz, 1H), 7.42 (t,  $J$  = 7.7 Hz, 1H), 7.25 (t,  $J$  = 7.5 Hz, 1H), 6.74 (s, 1H), 6.00 (br s, 1H), 5.79 (d,  $J$  = 10.2 Hz, 1H), 4.54 (d,  $J$  = 5.5 Hz, 0.5H), 4.45 (d,  $J$  = 7.1 Hz, 0.5H), 2.95 (*app.* t,  $J$  = 13.1 Hz, 1H), 2.49 – 2.47 (m, 1H), 2.06 – 1.96 (m, 1H), 1.70 – 1.58 (m, 1H), 1.36 – 1.23 (m, 1H), 1.12 – 1.01 (m, 3H), 0.98 – 0.90 (m, 3H). Integration of the resonances at 4.54 and 4.45 allowed determining the diastereomeric ratio of **19**/**20** as 1:1. <sup>13</sup>C NMR (125 MHz, DMSO-*d*<sub>6</sub>)  $\delta$  170.5, 170.1, 168.0, 167.6, 160.4, 147.8, 147.2, 138.1, 138.04, 137.98, 135.2, 130.1, 127.69, 127.67, 126.9, 126.0, 125.03, 125.02, 121.5, 115.23, 115.17, 85.4, 84.8, 77.23, 77.22, 69.2, 69.0, 68.8, 38.7, 38.6, 37.5, 37.0, 26.3, 26.0, 15.9, 15.8, 11.8, 11.7. IR (neat, cm<sup>-1</sup>): 3428, 2922, 1713, 1681, 1612, 1481, 1325, 1293, 1132, 1076; HRMS (ESI,  $m/z$ ) calcd for C<sub>25</sub>H<sub>24</sub>N<sub>4</sub>O<sub>4</sub>Na (M+Na<sup>+</sup>): 467.1690, found: 467.1696.

**(+)-(2*R*,3*R*,11*S*,14*S*)-11-*epi*-Isochaetominine C ((+)-7) and (–)-(2*S*,3*S*,11*R*,14*R*)-3,4,14-tris-*epi*-isochaetominine C ((–)-7)**

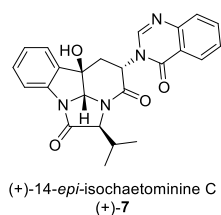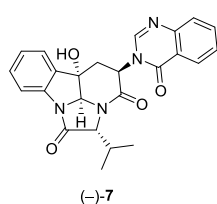

Following general procedure 4-B, the reaction of compound **21** (146 mg, 0.28 mmol) gave, after flash chromatography on silica gel (eluent: EtOAc:PE = 1:2 to 1:1), (+)-7

and (–)-**7** (white solid, 90 mg, yield: 75%) as a racemate. The  $^1\text{H}$  NMR,  $^{13}\text{C}$  NMR data are consistent with those reported in the literature [1].

**(–)-(2*S*,3*S*,11*R*,14*R*)-Isochaetominine [(–)-**10**]**

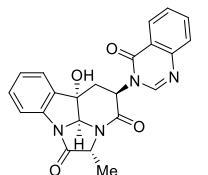

(–)-isochaetominine ((–)-**10**)

To a solution of a compound **22** (0.1 mmol) in anhydrous acetone (2 mL),  $\text{K}_2\text{CO}_3/\text{MeOH}$  (19 mg/2 mL, stood at rt overnight, pH = 11) was added and stirred at 35 °C for 30 min. The reaction was quenched with a saturated aqueous solution of  $\text{NH}_4\text{Cl}$  (5 mL) and concentrated under reduced pressure. Water (10 mL) was added to the resulting residue, and the mixture was extracted with EtOAc (10 mL  $\times$  3). The combined organic layers were washed with brine (2 mL), dried over anhydrous  $\text{Na}_2\text{SO}_4$ , filtered, and concentrated under reduced pressure. The residue was purified by flash chromatography on silica gel (eluent: EtOAc:PE = 3:2) to give compound (–)-**10** (28 mg, 71%) as white solid. The  $^1\text{H}$  NMR,  $^{13}\text{C}$  NMR data are consistent with those reported in the literature [1].

**General procedure for step 5**

In a manner similar to our previous work [2], a suspension of a quinazolinonyl dipeptide derivative (0.10 mmol) and 10% Pd/C (8 mg) in methanol (2 mL) was stirred under an atmosphere of  $\text{H}_2$  for 2 h at room temperature. The reaction mixture was filtered through a celite pad and the residue was washed with methanol. The filtrate was concentrated under reduced pressure to get the carboxylic acid. Without further purification, the residue was treated directly with HOBt (40 mg, 0.3 mmol) and EDCI (115 mg, 0.6 mmol) in anhydrous  $\text{CH}_2\text{Cl}_2$  (2 mL) and DMF (0.1 mL) at room temperature and stirred for 12 h. The reaction was quenched with water (5 mL), and the resulting mixture was extracted with  $\text{CH}_2\text{Cl}_2$  (10 mL  $\times$  3). The combined organic layers were washed with brine (2 mL), dried over anhydrous  $\text{Na}_2\text{SO}_4$ , filtered, and concentrated under reduced

pressure. The residue was purified by flash chromatography on silica gel to give the corresponding isochaetominine-type compound or versiquinazoline H-type compound.

**(-)-(2*R*,3*R*,11*S*,14*R*)-Isochaetominine A (4)**

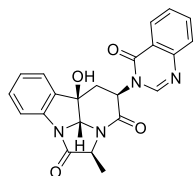

(-)-isochaetominine A (4)

Following general procedure 5, the reaction of compound **14** (51 mg, 0.10 mmol) gave, after flash chromatography on silica gel (eluent: EtOAc:PE = 1:1 to 2:1), compound **4** (37 mg, yield: 91%) as a white solid. The  $^1\text{H}$  NMR,  $^{13}\text{C}$  NMR data are consistent with those reported in the literature [1].

**(-)-(2*S*,3*S*,11*S*,14*S*)-3,4,14-tris-*epi* -Isochaetominine C (16)**

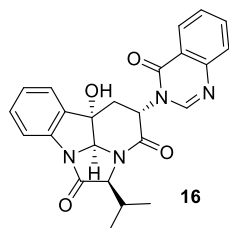

16

Following general procedure 5, the reaction of compound **15** (53 mg, 0.10 mmol) gave, after flash chromatography on silica gel (eluent: EtOAc:PE = 1:2 to 2:1), compound **16** (40 mg, yield: 92%) as a white solid. The  $^1\text{H}$  NMR,  $^{13}\text{C}$  NMR data are consistent with those reported in the literature [1].

**(-)-(2*R*,3*R*,11*S*,14*R*) -Isochaetominine C (6)**

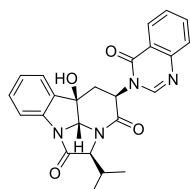

(-)-isochaetominine C (6)

Following general procedure 5, the reaction of compound **29** (53 mg, 0.10 mmol) gave, after flash chromatography on Silica gel (eluent: EtOAc:PE = 1:2 to 2:1), compound **6**

(39 mg, yield: 92%) as a white solid. The  $^1\text{H}$  NMR,  $^{13}\text{C}$  NMR data are consistent with those reported in the literature [2].

**6:**  $^1\text{H}$  NMR (500 MHz, Methanol- $d_4$ )  $\delta$  8.27 (dd,  $J = 8.2, 1.7$  Hz, 1H), 8.25 (s, 1H), 7.87 (m, 1H), 7.72 (d,  $J = 8.1$  Hz, 1H), 7.61 (d,  $J = 7.8$  Hz, 1H), 7.57 (d,  $J = 7.3$  Hz, 1H), 7.54 (s, 1H), 7.44 (td,  $J = 7.6, 1.4$  Hz, 1H), 7.28 (td,  $J = 7.4, 1.2$  Hz, 1H), 5.89 (s, 1H), 4.93 (dd,  $J = 7.7, 5.2$  Hz, 1H), 4.40 (d,  $J = 8.9$  Hz, 1H), 3.15 (dd,  $J = 14.3, 7.7$  Hz, 1H), 2.72 (dd,  $J = 14.3, 5.2$  Hz, 1H), 2.57 – 2.42 (m, 1H), 1.27 (t,  $J = 6.8$  Hz, 6H);  $^{13}\text{C}$  NMR (125 MHz, Methanol- $d_4$ )  $\delta$  175.4, 167.1, 162.1, 148.8, 147.9, 141.8, 136.0, 135.8, 131.7, 128.8, 128.0, 127.6, 126.8, 125.4, 123.2, 116.1, 85.9, 75.6, 71.5, 58.0, 35.8, 30.4, 20.7, 19.4.

#### **Crystal structure determination of compound 19/ 20.**

CCDC 1905613 contains the crystallographic data for compound **19/ 20**<sup>3</sup>. These data can be obtained free of charge from The Cambridge Crystallographic Data Centre via [www.ccdc.cam.ac.uk/structures](http://www.ccdc.cam.ac.uk/structures).

**Structure determination** Single crystals of **19/ 20** were obtained by slow evaporation of a mixed solution in MeOH,  $\text{CH}_2\text{Cl}_2$  and *n*-hexane. A suitable crystal was selected and measured with MoK $\alpha$  radiation ( $\lambda = 0.71073$  Å) on a Bruker SMART APEX-CCD diffractometer using a  $\psi$ - $\omega$  scan mode. The crystal was kept at 273.15 K during data collection. A total of 19407 reflections were collected in the range of  $3.12^\circ < 2\theta < 50^\circ$ , and 7625 were independent ( $R_{\text{int}} = 0.0366$ ,  $R_{\text{sigma}} = 0.0612$ ). Lattice determination and data collection were carried out using Bruker SMART software. Data reduction was performed with SAINT version 6.28A. Using Olex2<sup>3</sup>, the structure was solved with the olex2.solve<sup>4</sup> structure solution program using Charge Flipping and refined with the olex2.refine<sup>4</sup> refinement package using Gauss-Newton minimisation. The non-hydrogen atoms were refined anisotropically, and hydrogen atoms were determined with theoretical calculation.

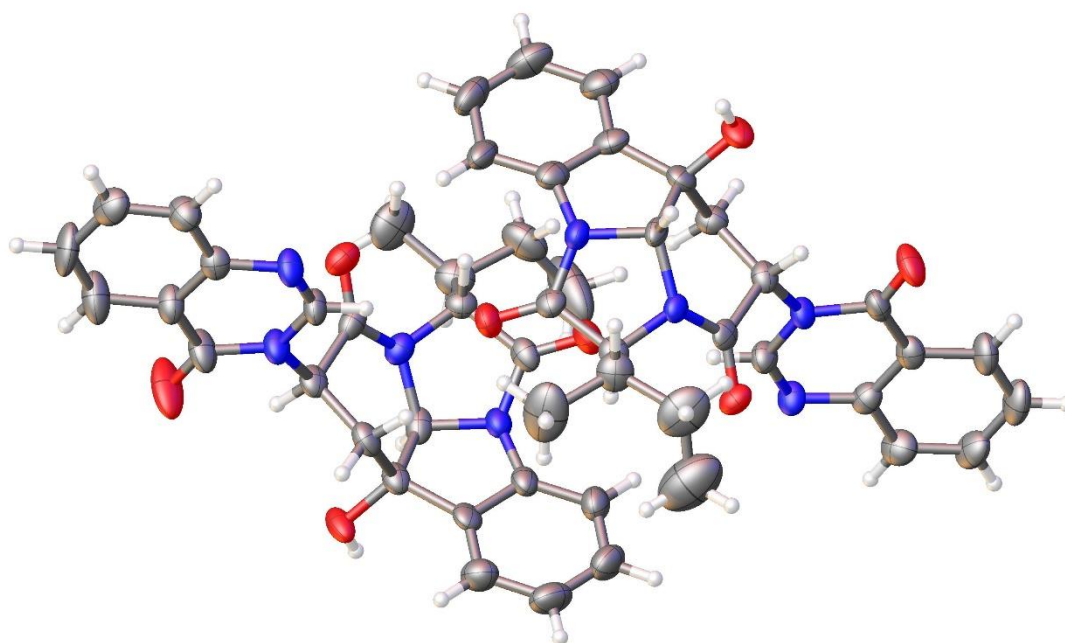

Figure S1 The thermal ellipsoid plot of **19/ 20** at 50% probability

**Table S1. Crystal data and structure refinement for 19/ 20.**

|                                                |                                                               |
|------------------------------------------------|---------------------------------------------------------------|
| Identification code                            | h0523m                                                        |
| Empirical formula                              | C <sub>25</sub> H <sub>24</sub> N <sub>4</sub> O <sub>4</sub> |
| Formula weight                                 | 444.48                                                        |
| Temperature/K                                  | 273.15                                                        |
| Crystal system                                 | monoclinic                                                    |
| Space group                                    | P2 <sub>1</sub>                                               |
| a/Å                                            | 10.5361(16)                                                   |
| b/Å                                            | 15.952(3)                                                     |
| c/Å                                            | 13.882(2)                                                     |
| $\alpha/^\circ$                                | 90                                                            |
| $\beta/^\circ$                                 | 109.384(3)                                                    |
| $\gamma/^\circ$                                | 90                                                            |
| Volume/Å <sup>3</sup>                          | 2200.8(6)                                                     |
| Z                                              | 44                                                            |
| $\rho_{\text{calc}}/\text{cm}^3$               | 1.3414                                                        |
| $\mu/\text{mm}^{-1}$                           | 0.093                                                         |
| F(000)                                         | 936.5                                                         |
| Crystal size/mm <sup>3</sup>                   | 0.4 × 0.3 × 0.2                                               |
| Radiation                                      | Mo K $\alpha$ ( $\lambda$ = 0.71073)                          |
| 2 $\theta$ range for data collection/ $^\circ$ | 3.12 to 50                                                    |
| Index ranges                                   | -14 ≤ h ≤ 14, -20 ≤ k ≤ 20, -18 ≤ l ≤ 18                      |

|                                                |                                                                  |
|------------------------------------------------|------------------------------------------------------------------|
| Reflections collected                          | 19407                                                            |
| Independent reflections                        | 7625 [ $R_{\text{int}} = 0.0366$ , $R_{\text{sigma}} = 0.0612$ ] |
| Data/restraints/parameters                     | 7625/1/601                                                       |
| Goodness-of-fit on $F^2$                       | 1.057                                                            |
| Final R indexes [ $I \geq 2\sigma(I)$ ]        | $R_1 = 0.0630$ , $wR_2 = 0.1432$                                 |
| Final R indexes [all data]                     | $R_1 = 0.0696$ , $wR_2 = 0.1475$                                 |
| Largest diff. peak/hole / $e \text{ \AA}^{-3}$ | 0.61/-0.23                                                       |
| Flack parameter                                | 1(3)                                                             |

**Table S2 Fractional Atomic Coordinates ( $\times 10^4$ ) and Equivalent Isotropic Displacement Parameters ( $\text{\AA}^2 \times 10^3$ ) for 19/20.  $U_{\text{eq}}$  is defined as 1/3 of the trace of the orthogonalised  $U_{\text{H}}$  tensor.**

| Atom | $x$      | $y$        | $z$        | $U(\text{eq})$ |
|------|----------|------------|------------|----------------|
| O001 | 11242(3) | 4523.3(18) | 3555.2(19) | 37.4(6)        |
| O002 | 3592(3)  | 5397.3(19) | 1581(2)    | 43.7(7)        |
| O003 | 6486(3)  | 4500.7(18) | 1529(2)    | 42.6(7)        |
| O004 | 13015(3) | 3401.4(19) | 6453(2)    | 50.6(8)        |
| O005 | 9001(3)  | 2394.2(18) | 5013(2)    | 45.6(7)        |
| N006 | 7220(3)  | 3487(2)    | 2743(2)    | 34.2(7)        |
| O007 | 5828(3)  | 7556.5(17) | 170(2)     | 45.4(7)        |
| O008 | 8315(3)  | 5486.9(19) | 3682(2)    | 46.2(7)        |
| N009 | 11652(3) | 4434.7(19) | 5566(2)    | 31.2(7)        |
| N00A | 9469(3)  | 3646.1(18) | 3112(2)    | 27.5(6)        |
| N00B | 5317(3)  | 6302(2)    | 2043(2)    | 34.1(7)        |
| N00C | 2742(3)  | 4061(2)    | -739(2)    | 39.2(8)        |
| N00D | 3219(3)  | 5491(2)    | -422(2)    | 38.0(8)        |
| N00E | 12224(3) | 5869(2)    | 5829(2)    | 35.3(8)        |
| C00F | 12827(4) | 4142(3)    | 6293(3)    | 34.7(9)        |
| N00G | 7574(3)  | 6497.5(19) | 2453(2)    | 33.7(7)        |
| C00H | 7839(4)  | 6669(2)    | 891(3)     | 36.0(9)        |
| C00I | 7366(4)  | 4046(3)    | 2057(3)    | 34.7(9)        |
| C00J | 10519(4) | 4034(2)    | 3803(3)    | 30.2(8)        |
| C00K | 8479(4)  | 3137(2)    | 4479(3)    | 34.6(9)        |
| C00L | 8808(4)  | 3995(2)    | 2089(3)    | 31.6(8)        |
| C00M | 1467(4)  | 4273(2)    | -1381(3)   | 35.7(9)        |
| C00N | 4146(4)  | 6095(2)    | 243(3)     | 34.2(9)        |
| O00O | 1784(4)  | 6507(2)    | -1254(3)   | 85.0(13)       |
| C00P | 526(4)   | 3650(3)    | -1776(3)   | 44.5(10)       |
| C00Q | 3502(4)  | 4659(3)    | -303(3)    | 36.4(9)        |

|      |          |         |          |          |
|------|----------|---------|----------|----------|
| C00R | 11408(4) | 5276(2) | 5399(3)  | 34.1(9)  |
| C00S | 6321(4)  | 3504(3) | 3302(3)  | 39.5(9)  |
| C00T | 5962(4)  | 5949(3) | 3073(3)  | 34.0(9)  |
| C00U | 6292(4)  | 6838(3) | 1792(3)  | 36.9(9)  |
| C00V | 13464(4) | 5629(3) | 6514(3)  | 35.1(9)  |
| C00W | 8499(3)  | 3123(2) | 3373(3)  | 29.8(8)  |
| C00X | 13780(4) | 4797(3) | 6779(3)  | 35.9(9)  |
| C00Y | 9351(4)  | 3850(2) | 5083(3)  | 33.7(9)  |
| C00Z | 6341(4)  | 6815(2) | 708(3)   | 34.6(9)  |
| C010 | 10697(4) | 3840(2) | 4920(3)  | 31.5(8)  |
| C011 | 15032(4) | 4594(3) | 7481(3)  | 45.9(11) |
| C012 | -743(4)  | 3850(3) | -2376(3) | 50.1(11) |
| C013 | 8493(4)  | 6468(3) | 1910(3)  | 36.3(9)  |
| C014 | 5499(4)  | 6109(2) | 92(3)    | 36.4(9)  |
| C015 | 7437(4)  | 5934(2) | 3138(3)  | 35.1(9)  |
| C016 | 4301(4)  | 5894(3) | 1352(3)  | 35.3(9)  |
| C017 | 4996(4)  | 3727(3) | 2967(4)  | 46.0(11) |
| C018 | 1100(4)  | 5101(3) | -1597(3) | 41.2(10) |
| C019 | 6349(5)  | 3304(3) | 4994(4)  | 50.8(11) |
| C01A | 15970(4) | 5197(4) | 7868(3)  | 55.3(13) |
| C01B | 7011(4)  | 3298(3) | 4306(3)  | 38.8(10) |
| C01C | 4998(5)  | 3511(4) | 4675(4)  | 65.2(15) |
| C01D | 9842(4)  | 6287(3) | 2277(3)  | 45.0(10) |
| C01E | 8520(5)  | 6688(3) | 231(3)   | 50.6(12) |
| C01F | 5661(5)  | 6432(3) | 3929(3)  | 49.6(11) |
| C01G | 8975(5)  | 3470(3) | 1218(3)  | 47.5(11) |
| C01H | 2036(5)  | 5766(3) | -1109(3) | 47.7(11) |
| C01I | 4338(4)  | 3728(3) | 3680(4)  | 59.4(13) |
| C01J | 14432(4) | 6246(3) | 6918(3)  | 46.8(11) |
| C01K | 10524(4) | 6296(3) | 1593(4)  | 54.2(12) |
| C01L | 10433(6) | 3313(4) | 1334(4)  | 77.5(18) |
| C01M | -1096(4) | 4670(4) | -2619(3) | 59.7(14) |
| C01N | 6510(6)  | 6118(3) | 4977(3)  | 63.2(14) |
| C01O | 15664(4) | 6031(3) | 7576(3)  | 50.9(12) |
| C01P | -194(5)  | 5303(3) | -2225(4) | 60.5(14) |
| C01Q | 9880(5)  | 6487(3) | 568(4)   | 59.8(13) |
| C01R | 4183(5)  | 6341(4) | 3786(4)  | 71.2(15) |
| C01S | 8170(6)  | 3853(5) | 189(3)   | 89(2)    |
| C01T | 7692(8)  | 6661(4) | 5480(5)  | 123(3)   |
| C01U | 11149(7) | 4010(5) | 1190(6)  | 123(3)   |

## Chiral HPLC diagrams of compounds (±)-7 and (+)-7

The enantiomeric excess (*ee*) of compounds (+)-7 and (–)-7 was determined by HPLC analysis (column, Chiralpak AD-H 4.6 × 250 mm; *n*-hexane/ iPrOH= 50:50; flow rate: 1.0 mL/min) *t<sub>R</sub>* (min): (+)-7: 13.712 (99.3%), (–)-7: 10.522 (0.6%), *ee* = 98.7%.

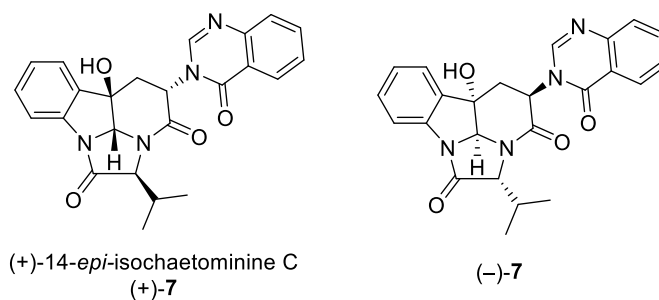

## HPLC analysis of (±)-7

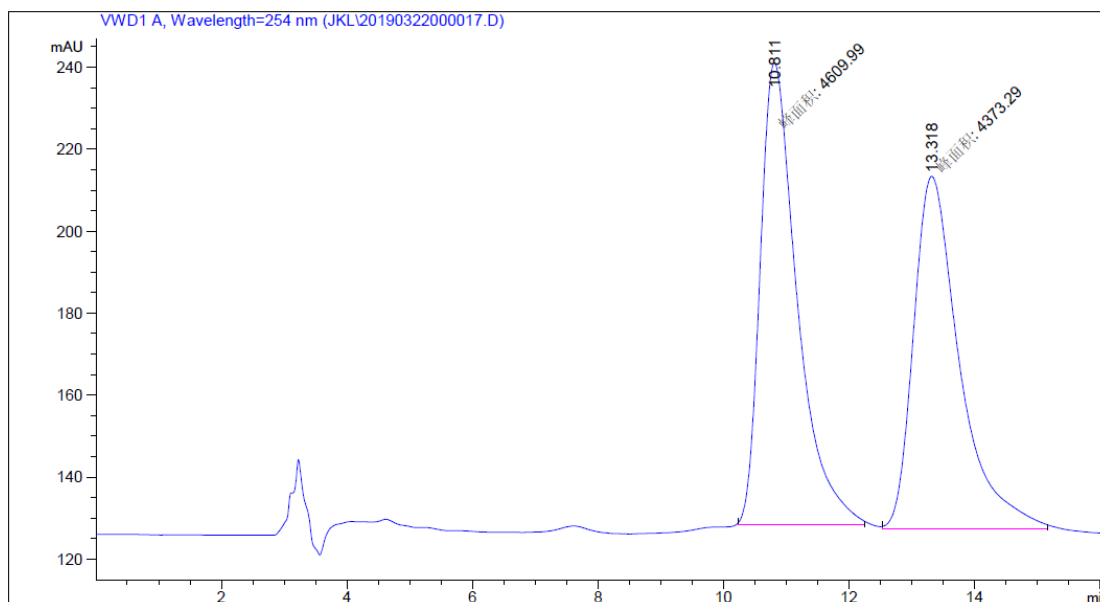

| Peak # | RetTime [min] | Yype | Area [Mau*s] | Height [mAU] | Area %  |
|--------|---------------|------|--------------|--------------|---------|
| 1      | 10.811        | MM   | 4609.99072   | 112.72957    | 51.3175 |
| 2      | 13.318        | MM   | 4373.28760   | 86.02417     | 48.6825 |
| Total  |               |      | 8983.27832   | 198.75374    |         |



# HPLC analysis of (+)-7

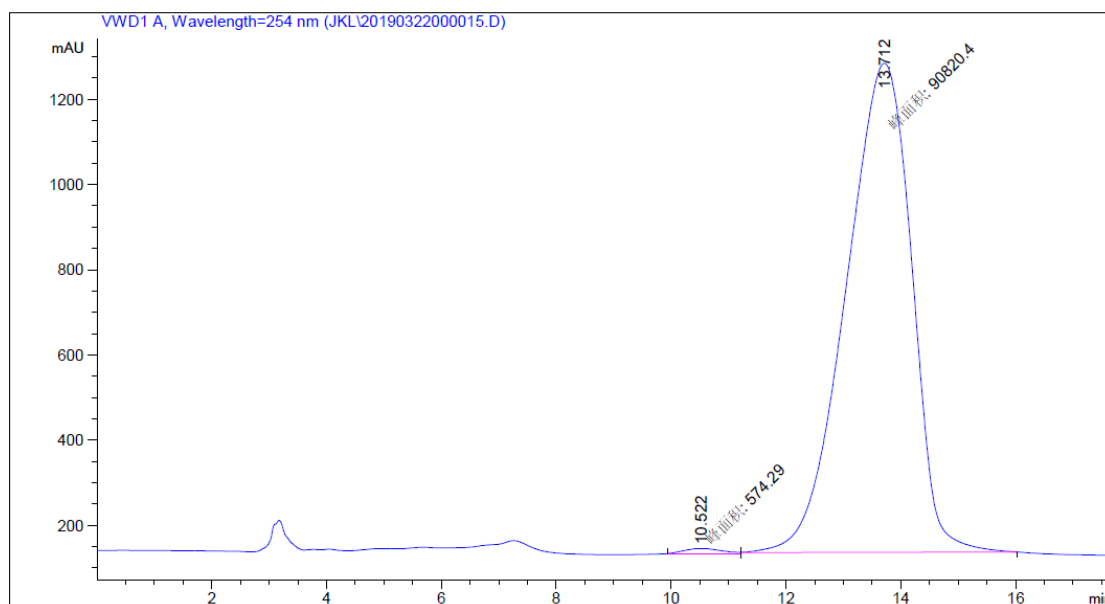

| Peak # | RetTime [min] | Y type | Area [Mau*s] | Height [mAU] | Area %  |
|--------|---------------|--------|--------------|--------------|---------|
| 1      | 10.522        | MM     | 574.29022    | 12.51264     | 0.6284  |
| 2      | 13.712        | MM     | 9.08204e4    | 1147.79028   | 99.3716 |
| Total  |               |        | 9.13947e4    | 1160.30292   |         |

The comparison of  $^1\text{H}$  NMR and  $^{13}\text{C}$  NMR data of our synthetic (–)-isochaetominine C (6) with *Aspera chaetominine* B.

**Table S3. Comparison of  $^1\text{H}$  NMR data of our synthetic (–)-isochaetominine C (6) with *Aspera chaetominine* B**

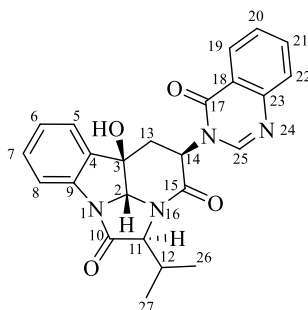

(–)-isochaetominine C (6)

| Position | Aspera chaetominine B [3]                    | This work                                    | $\Delta$<br>(ppm) |
|----------|----------------------------------------------|----------------------------------------------|-------------------|
|          | $^1\text{H}$ NMR (500 MHz, Methanol- $d_4$ ) | $^1\text{H}$ NMR (500 MHz, Methanol- $d_4$ ) |                   |
| 2        | 5.86 (1H, s)                                 | 5.89 (s, 1H)                                 | -0.03             |
| 3-OH     | -                                            | -                                            | -                 |
| 5        | 7.60 (1H, d, $J = 7.8$ )                     | 7.57 (d, $J = 7.3$ Hz, 1H)                   | 0.03              |
| 6        | 7.30 (1H, td, $J = 7.5, 0.5$ Hz)             | 7.28 (td, $J = 7.4, 1.2$ Hz, 1H)             | 0.02              |
| 7        | 7.45 (1H, td, $J = 7.8, 1.1$ Hz)             | 7.44 (td, $J = 7.6, 1.4$ Hz, 1H)             | 0.02              |
| 8        | 7.57 (1H, d, $J = 7.6$ Hz)                   | 7.54 (s, 1H)                                 | 0.03              |
| 11       | 4.40 (1H, d, $J = 9.0$ Hz)                   | 4.40 (d, $J = 8.9$ Hz, 1H)                   | 0                 |
| 12       | 2.52 (1H, m)                                 | 2.57 – 2.42 (m, 1H)                          | 0                 |
| 13       | 2.74 (1H, dd, $J = 14.3, 5.3$ Hz)            | 2.72 (dd, $J = 14.3, 5.2$ Hz, 1H)            | 0.02              |
|          | 3.17 (1H, dd, $J = 14.3, 7.8$ Hz)            | 3.15 (dd, $J = 14.3, 7.7$ Hz, 1H)            | 0.02              |
| 14       | 4.93 (1H, m)                                 | 4.93 (dd, $J = 7.7, 5.2$ Hz, 1H)             | 0                 |
| 19       | 8.29 (1H, d, $J = 8.0$ Hz)                   | 8.27 (d, $J = 8.2$ Hz, 1H)                   | 0.02              |
| 20       | 7.63 (1H, d, $J = 8.0$ Hz)                   | 7.61 (d, $J = 7.8$ Hz, 1H)                   | 0.02              |
| 21       | 7.89 (1H, m)                                 | 7.87 (m, 1H)                                 | 0.02              |
| 22       | 7.74 (1H, d, $J = 8.0$ Hz)                   | 7.72 (d, $J = 8.1$ Hz, 1H)                   | 0.02              |
| 25       | 8.25 (1H, s)                                 | 8.25 (s, 1H)                                 | 0                 |
| 26       | 1.26 (3H, t, $J = 7.5$ Hz)                   | 1.27 (t, $J = 6.8$ Hz, 6H)                   | 0                 |
| 27       | 1.28 (3H, t, $J = 7.5$ Hz)                   |                                              |                   |

**Table S4. Comparison of  $^{13}\text{C}$  NMR data of our synthetic (–)-isochaetominine C (6) with Aspera chaetominine B**

| Position | Aspera chaetominine B [3]<br>$^{13}\text{C}$ NMR<br>(125 MHz, Methanol- $d_4$ ) | This work<br>$^{13}\text{C}$ NMR<br>(125 MHz, Methanol- $d_4$ ) | $\Delta$<br>(ppm) |
|----------|---------------------------------------------------------------------------------|-----------------------------------------------------------------|-------------------|
| 2        | 85.9                                                                            | 85.9                                                            | 0                 |
| 3        | 75.6                                                                            | 75.6                                                            | 0                 |
| 4        | 135.5                                                                           | 135.8                                                           | -0.3              |
| 5        | 125.4                                                                           | 125.4                                                           | 0                 |
| 6        | 126.8                                                                           | 126.8                                                           | 0                 |
| 7        | 131.7                                                                           | 131.7                                                           | 0                 |
| 8        | 116.1                                                                           | 116.1                                                           | 0                 |
| 9        | 142.0                                                                           | 141.8                                                           | 0.2               |
| 10       | 175.5                                                                           | 175.4                                                           | 0.1               |
| 11       | 71.5                                                                            | 71.5                                                            | 0                 |
| 12       | 30.4                                                                            | 30.4                                                            | 0                 |
| 13       | 35.7                                                                            | 35.8                                                            | -0.1              |
| 14       | 58.0                                                                            | 58.0                                                            | 0                 |
| 15       | 162.6                                                                           | 162.1                                                           | 0.5               |
| 17       | 159.0                                                                           | 159.0                                                           | 0                 |
| 18       | 123.2                                                                           | 123.2                                                           | 0.1               |
| 19       | 127.6                                                                           | 127.6                                                           | 0                 |
| 20       | 128.8                                                                           | 128.8                                                           | 0                 |
| 21       | 136.0                                                                           | 136.0                                                           | 0                 |
| 22       | 128.0                                                                           | 128.0                                                           | 0                 |
| 23       | 148.8                                                                           | 148.8                                                           | 0                 |
| 25       | 148.0                                                                           | 147.9                                                           | 0.1               |
| 26       | 19.4                                                                            | 19.4                                                            | 0                 |
| 27       | 20.7                                                                            | 20.7                                                            | 0                 |

## References

- [1] Mao, Z.-Y.; Geng, H.; Zhang, T.-T.; Ruan, Y.-P.; Ye, J.-L.; Huang, P.-Q. *Org. Chem. Front.* **2016**, *3*, 24-37. doi:10.1039/c5qo00298b  
Correction: Mao, Z. Y.; Mao, Z.-Y.; Geng, H.; Zhang, T.-T.; Ruan, Y.-P.; Ye, J.-L.; Huang, P.-Q. *Org. Chem. Front.* **2024**, *11*, 2693-2693. doi:10.1039/D4QO90034K
- [2] Wu, J.-F.; Huang, P.-Q. *Chin. Chem. Lett.* **2020**, *31*, 61-63. doi:10.1016/j.cclet.2019.06.043
- [3] Fredimoses, M.; Ai, W.; Lin, X.-P.; Zhou, X.-F.; Liao, S.-R.; Pan, L.; Liu, Y.-H. *Nat. Prod. Res.* **2025**, *39*, 566-578. doi:10.1080/14786419.2023.2275744

# <sup>1</sup>H NMR and <sup>13</sup>C NMR spectra of new products

<sup>1</sup>H NMR spectrum of **19** and **20** (DMSO-*d*<sub>6</sub>)

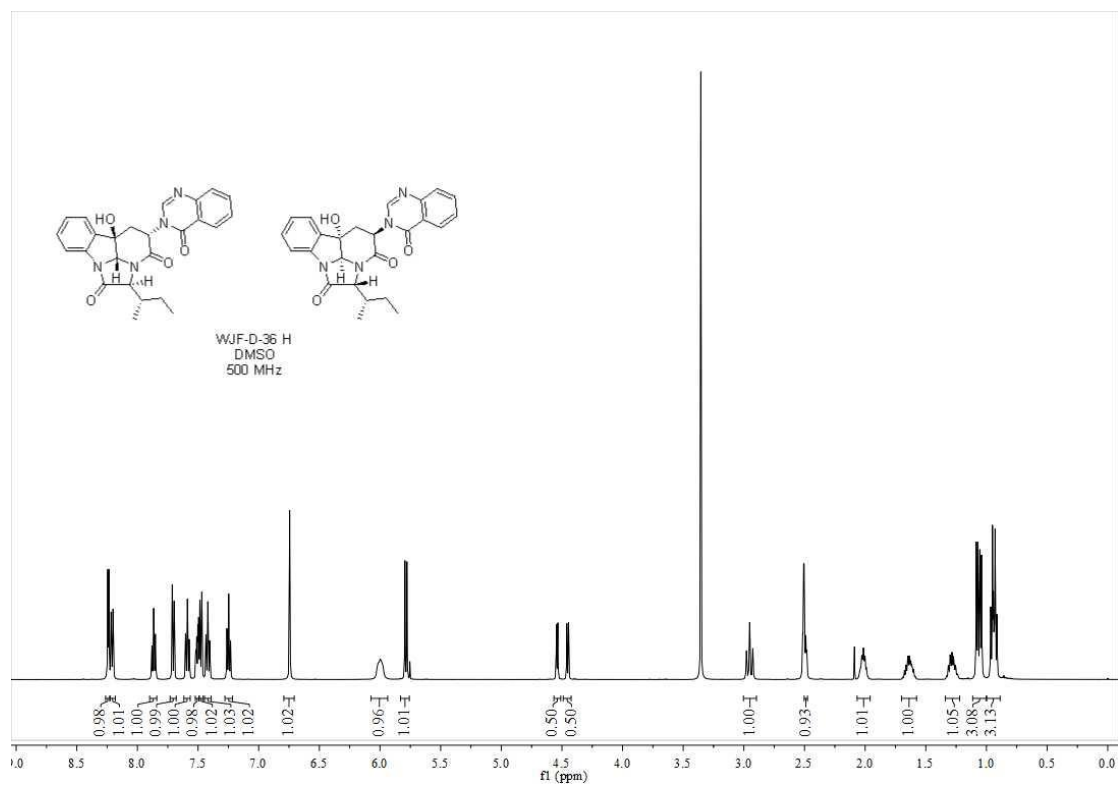

<sup>13</sup>C NMR spectrum of **19** and **20** (DMSO-*d*<sub>6</sub>)

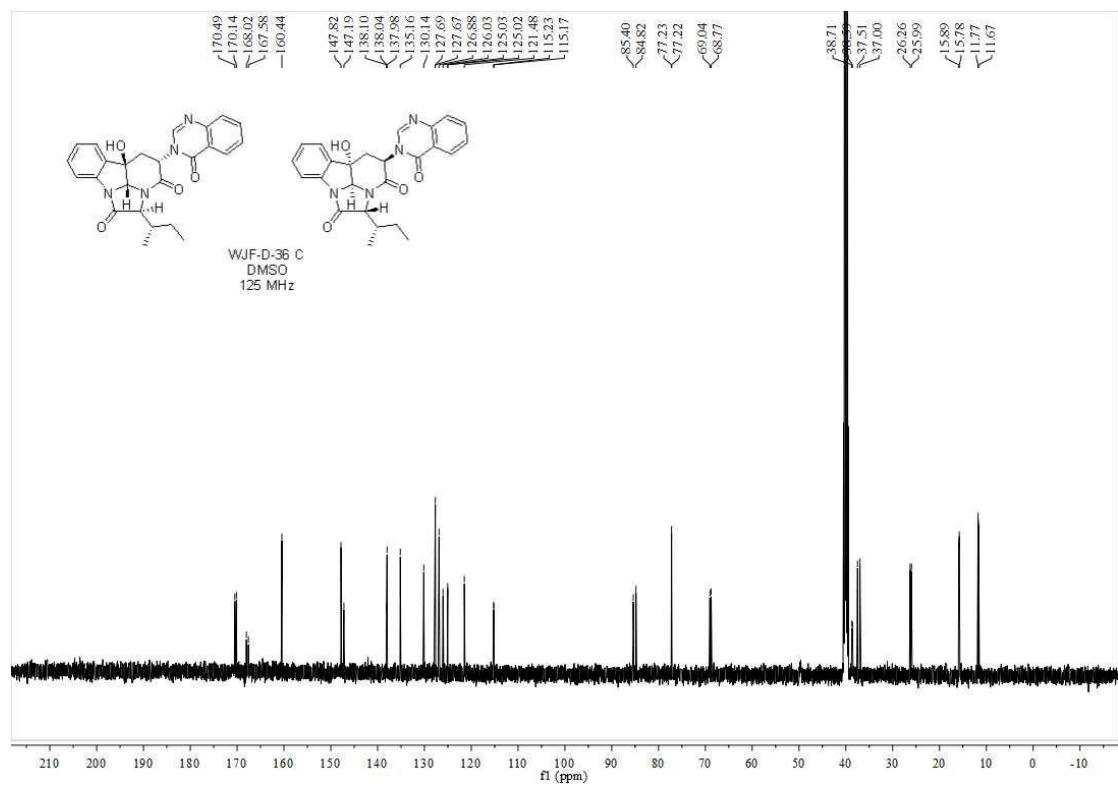

$^1\text{H}$  NMR spectrum of **25** ( $\text{CDCl}_3$ )

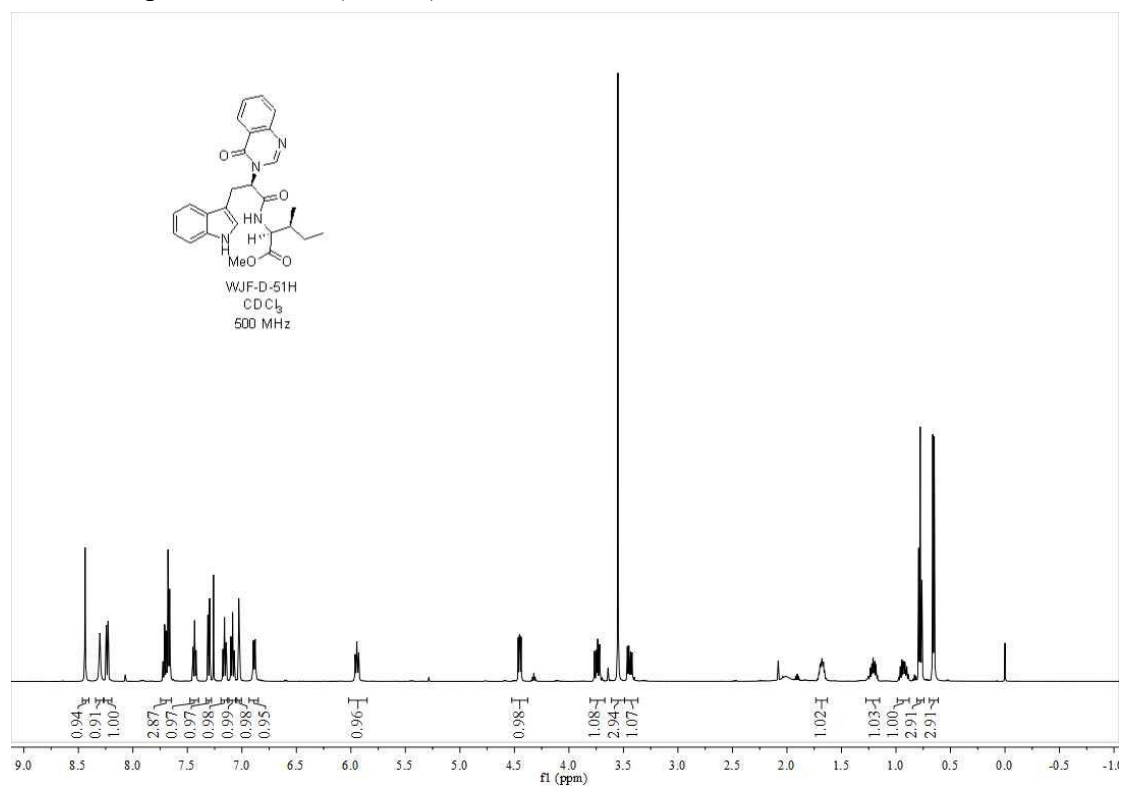

$^{13}\text{C}$  NMR spectrum of **25** ( $\text{CDCl}_3$ )

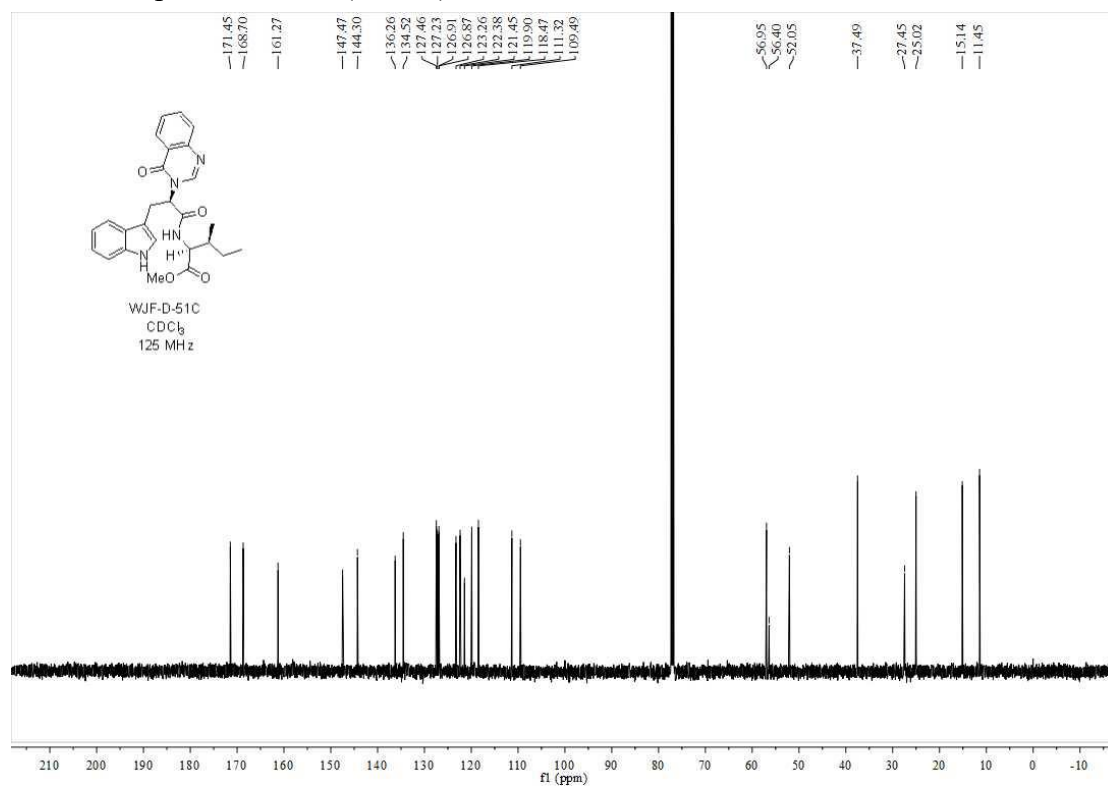

$^1\text{H}$  NMR spectrum of **26** ( $\text{CDCl}_3$ )

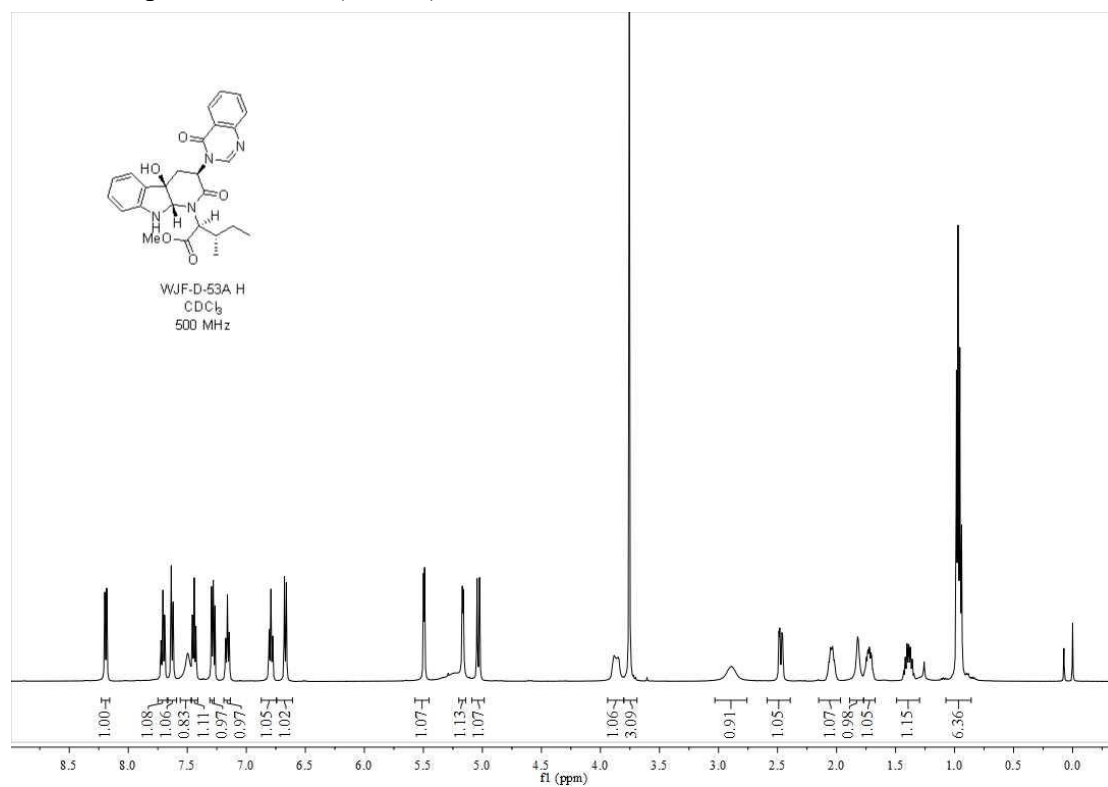

$^{13}\text{C}$  NMR spectrum of **26** ( $\text{CDCl}_3$ )

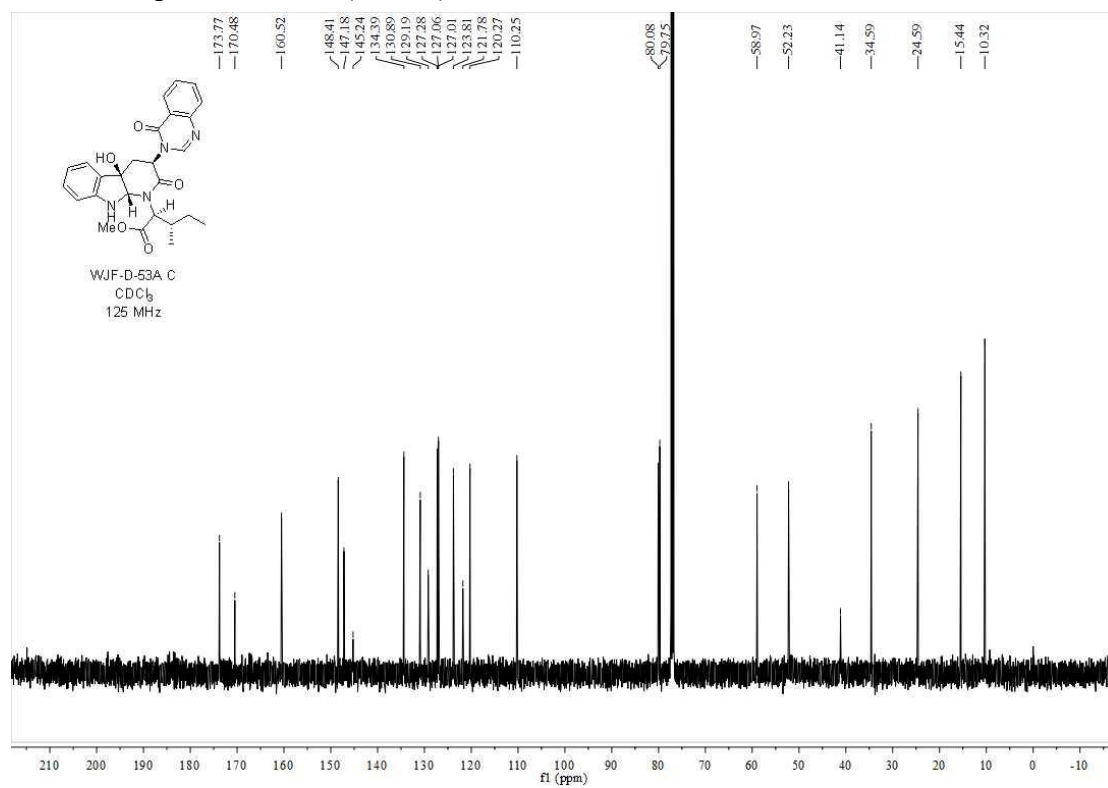

$^1\text{H}$  NMR spectrum of **12** (methanol- $d_4$ )

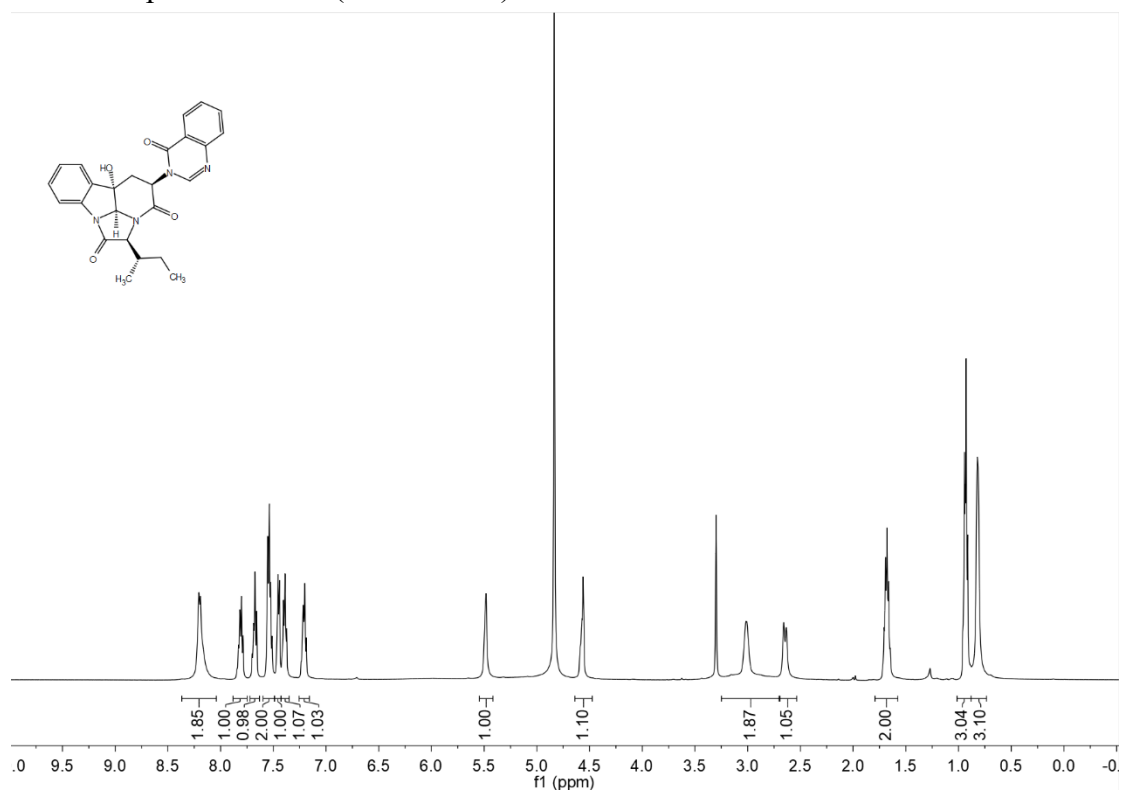

$^{13}\text{C}$  NMR spectrum of **12** (methanol- $d_4$ )

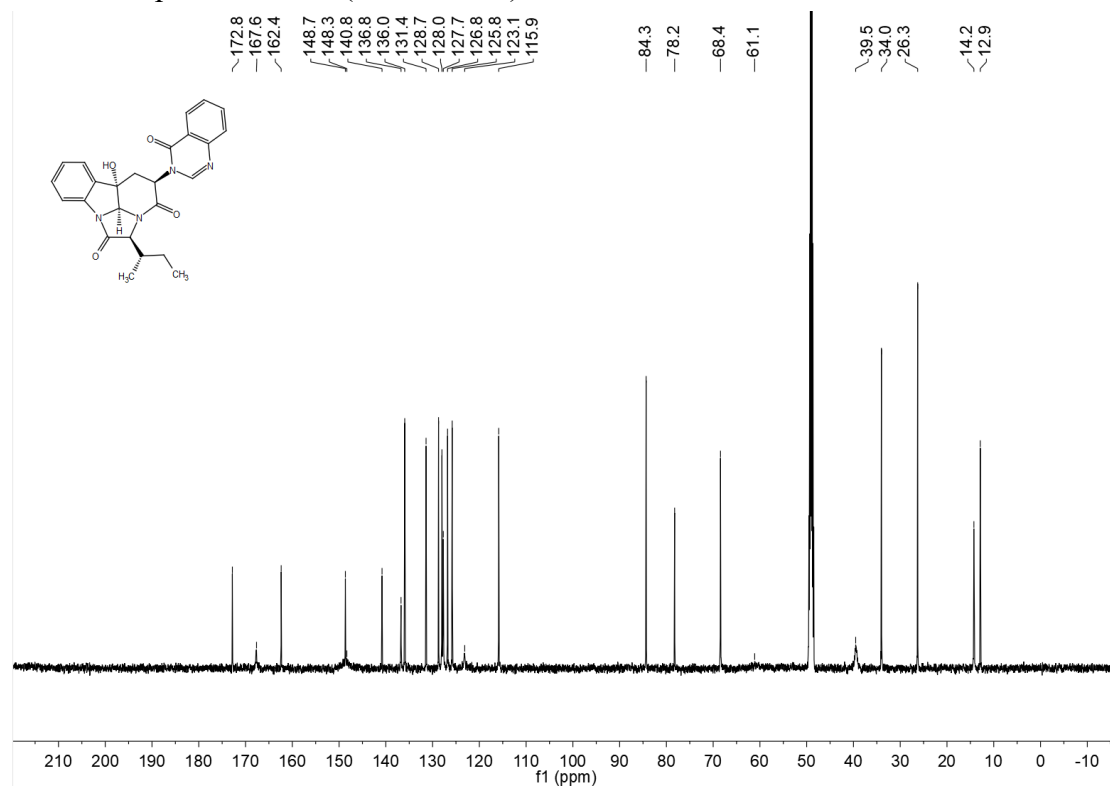



$^1\text{H}$  NMR spectrum of **13** (methanol- $d_4$ )

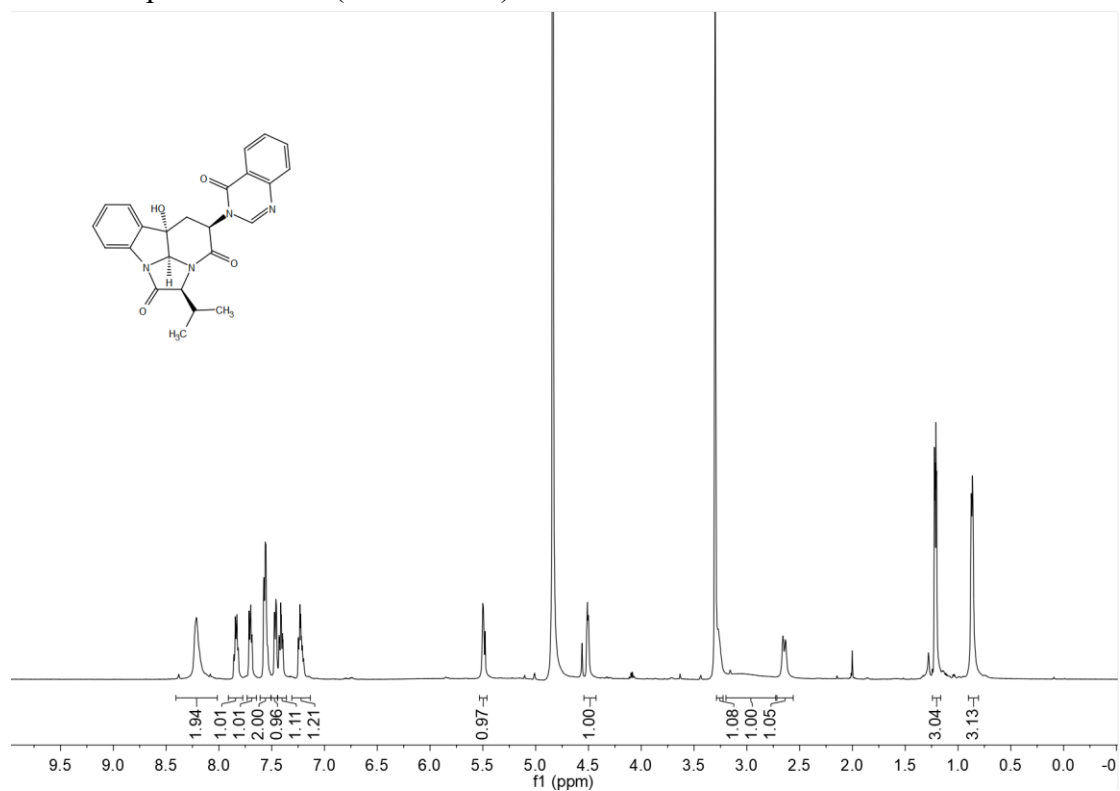

$^{13}\text{C}$  NMR spectrum of **13** (methanol- $d_4$ )

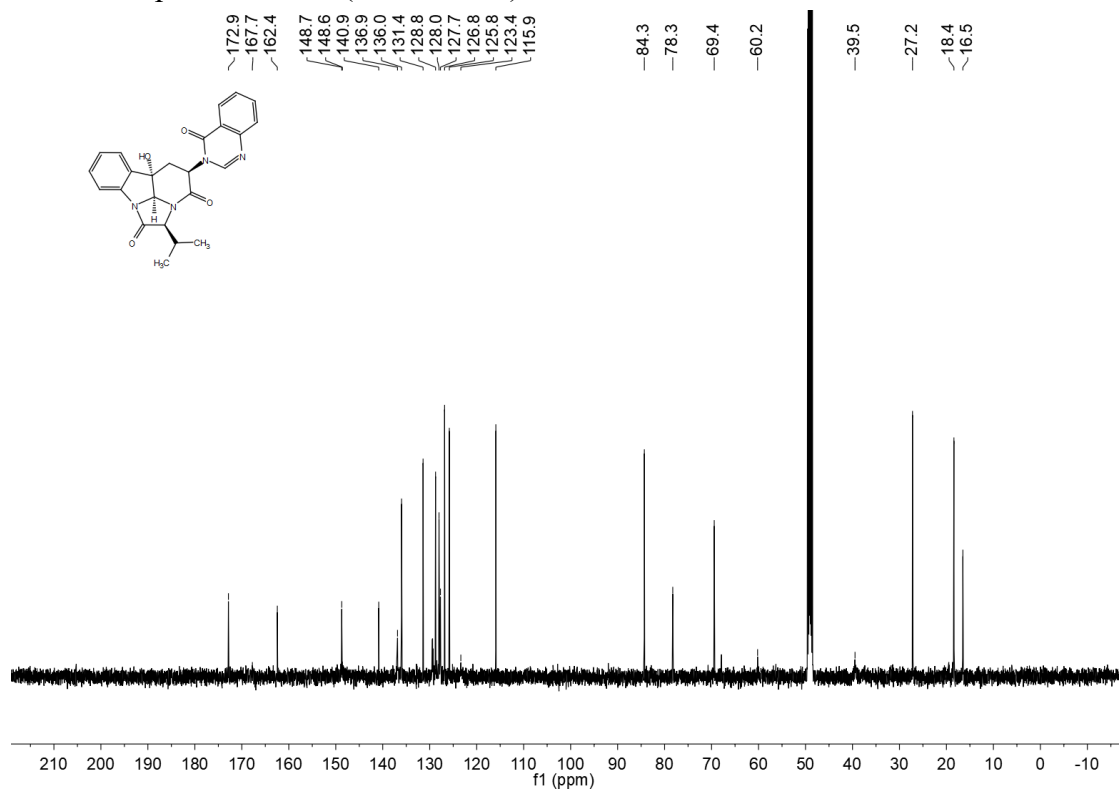

$^1\text{H}$  NMR spectrum of **6** (methanol- $d_4$ )

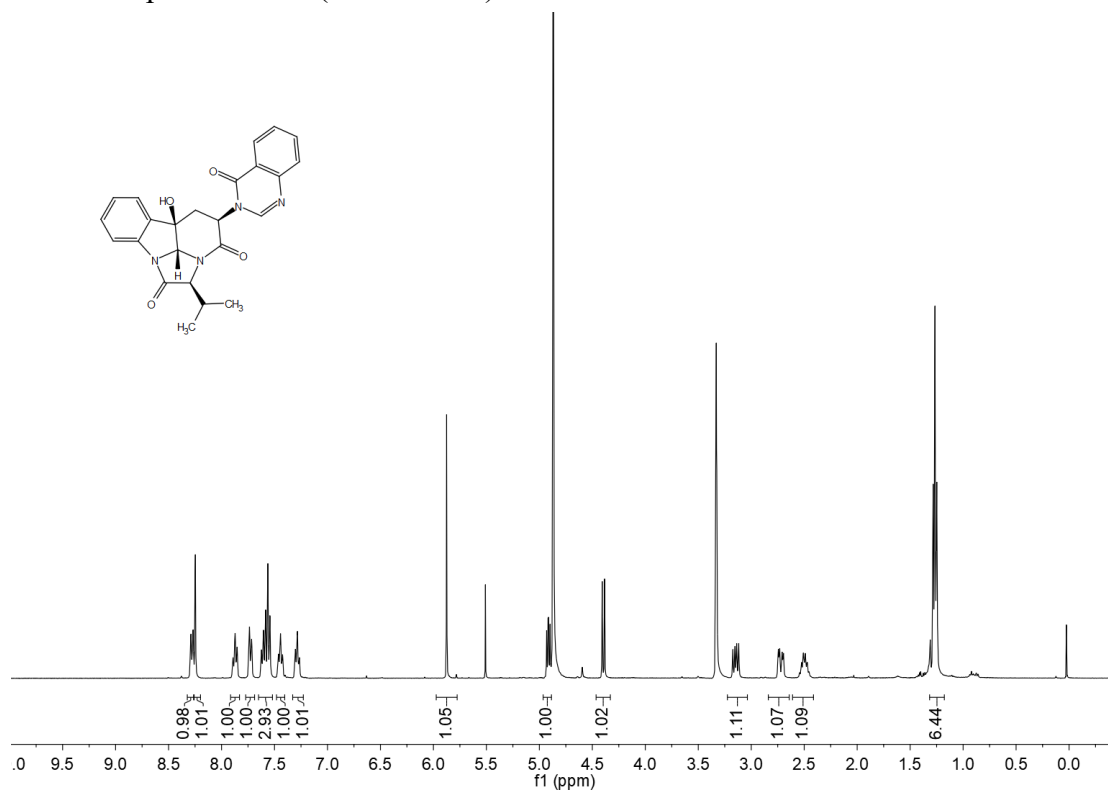

$^{13}\text{C}$  NMR spectrum of **6** (methanol- $d_4$ )

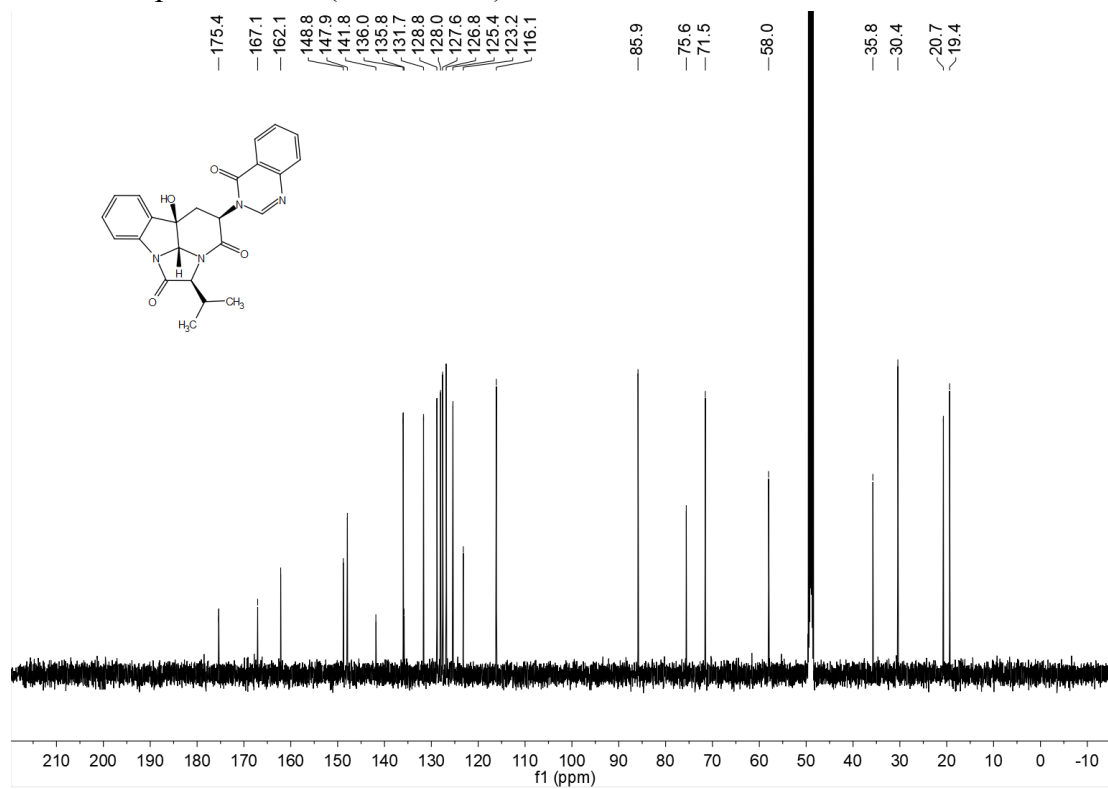

Supplement: Additional file 1 [file 1860-5397-21-162-S1.pdf]
